# Supplementary material
Source: Springer Nature journal article supplement (https://www.springermedizin.de/resource/supplementary/13256_2014_3077_MOESM1_ESM.pdf/9651164)

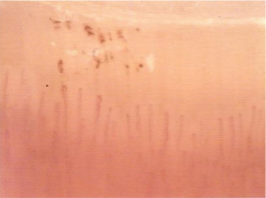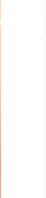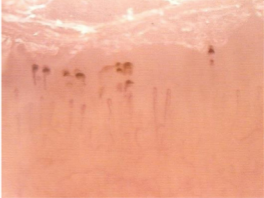

Supplement: MOESM1 [file 9651164]
